# Supplementary material for: The Shape Modulation of Laser-Induced Nanowelded Microstructures Using Two Colors
Source: MDPI journal article supplement (doi:10.3390/colloids7040067), 2023-11-09
Supplement: s1 [file s1]

## Supplementary Materials

# The Shape Modulation of Laser-Induced Nanowelded Microstructures Using Two Colors

Ariel Rogers <sup>1</sup>, Isabelle I. Niyonshuti <sup>2</sup>, Jun Ou <sup>3,4</sup>, Diksha Shrestha <sup>1,5</sup>, Deborah Okyere <sup>2,6</sup>, Jingyi Chen <sup>2,6</sup> and Yong Wang <sup>1,5,6\*</sup>

<sup>1</sup> Department of Physics, University of Arkansas, Fayetteville, AR 72701, USA

<sup>2</sup> Department of Chemistry and Biochemistry, University of Arkansas, Fayetteville, AR 72701, USA

<sup>3</sup> School of Engineering, California State Polytechnic University Humboldt, Arcata, CA 95521, USA

<sup>4</sup> Mechanical Engineering Program, California State Polytechnic University Humboldt, Arcata, CA 95521, USA

<sup>5</sup> Cell and Molecular Graduate Program, University of Arkansas, Fayetteville, AR 72701, USA

<sup>6</sup> Materials Science and Engineering Program, University of Arkansas, Fayetteville, AR 72701, USA

\* Correspondence: [yongwang@uark.edu](mailto:yongwang@uark.edu)

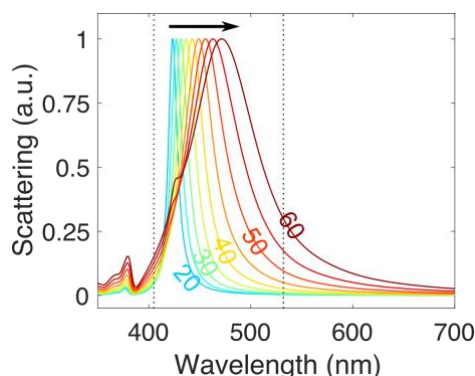

**Figure S1.** Calculated scattering spectra of single AgNPs of different sizes (20 – 60 nm) using the MNPBEM17 toolbox [1–3], where red shifts are revealed for larger AgNPs.

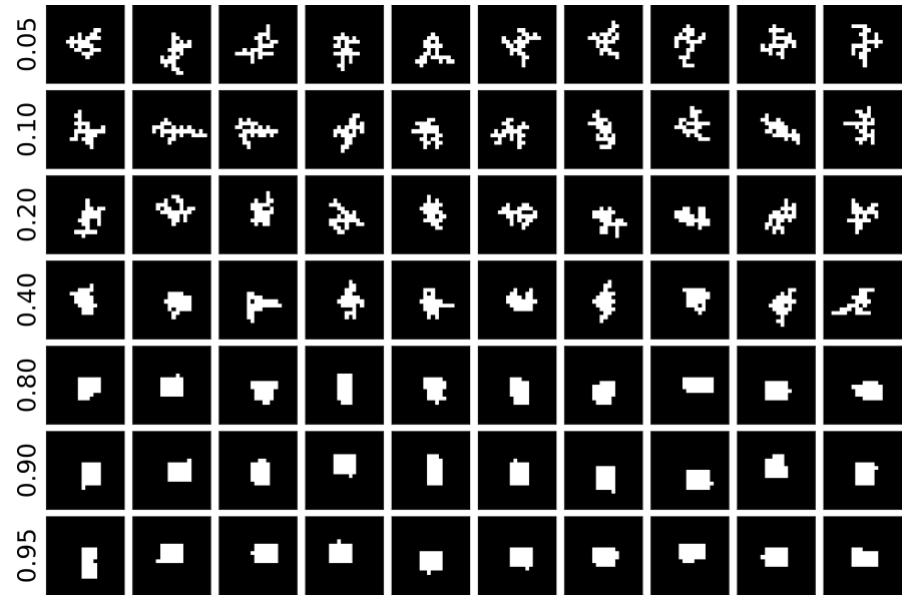

**Figure S2.** Representative shapes (randomly chosen from 1000 simulations) of nanowelded microstructures with different  $P_m$  values ranging from 0.05 to 0.95.

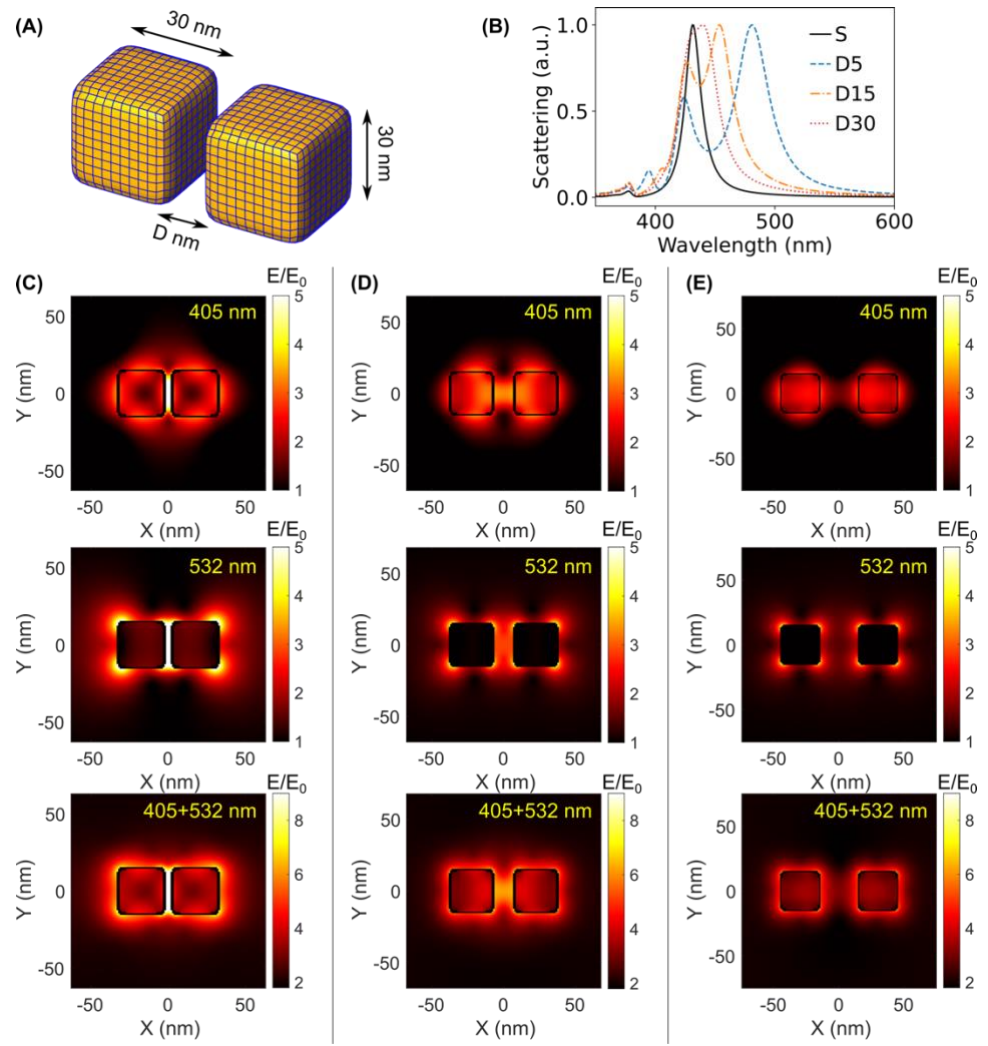

**Figure S3.** (A) Geometry of two AgNPs separated by  $D$  nm. (B) Calculated scattering spectra (rescaled) of two AgNP with different separation distances of  $D = 5, 15$ , and  $30$  nm, using the MNPBEM17 toolbox [1–3]. S indicates the spectrum of a single AgNP. (C, D, E) Calculated electric field enhancement of the two AgNPs when illuminated with (top) only a 405 nm laser, (middle) only a 532 nm laser, and (bottom) both the 405 and 532 nm lasers, with different separation distances (panel C:  $D = 5$  nm, panel D:  $D = 15$  nm, panel E:  $D = 30$  nm) using the MNPBEM17 toolbox [1–3].

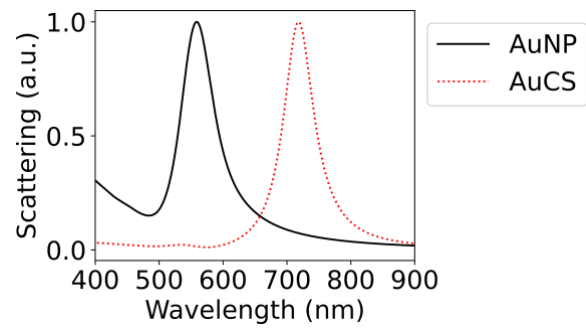

**Figure S4.** Calculated scattering spectra of a single gold nanoparticle (AuNP) and a cross-shaped gold microstructure (AuCS) using the MNPBEM17 toolbox [1–3].

## References

1. Hohenester, U.; Trügler, A. MNPBEM – A Matlab Toolbox for the Simulation of Plasmonic Nanoparticles. *Computer Physics Communications* **2012**, *183*, 370–381, doi:10.1016/j.cpc.2011.09.009.
2. Waxenegger, J.; Trügler, A.; Hohenester, U. Plasmonics Simulations with the MNPBEM Toolbox: Consideration of Substrates and Layer Structures. *Computer Physics Communications* **2015**, *193*, 138–150, doi:10.1016/j.cpc.2015.03.023.
3. Hohenester, U. Simulating Electron Energy Loss Spectroscopy with the MNPBEM Toolbox. *Computer Physics Communications* **2014**, *185*, 1177–1187, doi:10.1016/j.cpc.2013.12.010.
